# Supplementary material for: Linkage Disequilibrium and Population Structure in Wild and Cultivated Populations of Rubber Tree (Hevea brasiliensis)
Source: Front Plant Sci. 2018 Jul 3;9:815. doi: 10.3389/fpls.2018.00815 (PMC6037771; doi:10.3389/fpls.2018.00815)
Supplement: TABLE S1 — Origin of germplasm genotypes and population structure results. [file Table_1.XLSX]

## Sheet: Plan1
Supplementary Table 1. Origin of germplasm genotypes and results of population structure.
Number	Sample_name	Wild	Cultivated	Origin
1	AC68	0.9995	0.0005	Acre
3	ACB19111	0.9552	0.0448	Acre
4	ACB1925_2	0.9998	0.0002	Acre
5	ACB1958	0.9994	0.0006	Acre
6	ACB1996	0.9797	0.0203	Acre
7	ACF517	0.999	0.001	Acre
8	ACF6162	0.9314	0.0686	Acre
9	ACFA652	0.9995	0.0005	Acre
10	ACI25	0.3692	0.6308	Acre
11	ACS09525	0.999	0.001	Acre
12	ACS1112	1000	0.0000	Acre
13	ACS1161	0.999	0.001	Acre
14	ACS12123	0.9993	0.0007	Acre
15	ACS12129	0.0028	0.9972	Acre
16	ACS12232	1000	0.0000	Acre
17	ACS12234	1000	0.0000	Acre
18	ACS1234	0.9995	0.0005	Acre
19	ACS8116	1000	0.0000	Acre
20	ACY21615	0.9997	0.0003	Acre
21	AM95_06	1000	0.0000	Amazonas
22	AM95_07	0.5176	0.4824	Amazonas
23	AM95_08	1000	0.0000	Amazonas
24	AM95_100	0.9995	0.0005	Amazonas
25	AM95_102	0.6134	0.3866	Amazonas
26	AM95_103	0.999	0.001	Amazonas
27	AM95_104	0.9985	0.0015	Amazonas
28	AM95_105	0.9984	0.0016	Amazonas
29	AM95_106	0.999	0.001	Amazonas
30	AM95_107	0.9986	0.0014	Amazonas
32	AM95_109	0.9995	0.0005	Amazonas
33	AM95_110	0.999	0.001	Amazonas
34	AM95_111	0.995	0.005	Amazonas
35	AM95_112	0.9854	0.0146	Amazonas
36	AM95_113	0.9985	0.0015	Amazonas
37	AM95_114	0.999	0.001	Amazonas
38	AM95_115	0.9641	0.0359	Amazonas
39	AM95_116	0.999	0.001	Amazonas
41	AM95_118	0.999	0.001	Amazonas
42	AM95_119	0.9985	0.0015	Amazonas
43	AM95_120	0.998	0.002	Amazonas
44	AM95_121	0.9995	0.0005	Amazonas
45	AM95_123	0.9985	0.0015	Amazonas
46	AM95_124	0.999	0.001	Amazonas
47	AM95_126	0.4586	0.5414	Amazonas
48	AM95_127	0.9985	0.0015	Amazonas
49	AM95_128	0.4649	0.5351	Amazonas
50	AM95_130	0.999	0.001	Amazonas
51	AM95_131	0.9945	0.0055	Amazonas
52	AM95_133	0.9985	0.0015	Amazonas
53	AM95_134	0.999	0.001	Amazonas
54	AM95_137	0.9995	0.0005	Amazonas
55	AM95_138	0.4706	0.5294	Amazonas
56	AM95_139	0.9845	0.0155	Amazonas
57	AM95_140	0.9995	0.0005	Amazonas
58	AM95_142	0.9987	0.0013	Amazonas
59	AM95_143	0.9985	0.0015	Amazonas
60	AM95_144	0.9985	0.0015	Amazonas
61	AM95_145	0.9885	0.0115	Amazonas
62	AM95_146	0.9854	0.0146	Amazonas
63	AM95_147	0.992	0.008	Amazonas
64	AM95_148	0.9395	0.0605	Amazonas
65	AM95_151	0.9934	0.0066	Amazonas
66	AM95_153	0.996	0.004	Amazonas
67	AM95_154	0.9985	0.0015	Amazonas
68	AM95_155	0.9994	0.0006	Amazonas
69	AM95_156	0.9945	0.0055	Amazonas
70	AM95_157	0.985	0.015	Amazonas
71	AM95_158	0.9955	0.0045	Amazonas
72	AM95_159	0.999	0.001	Amazonas
73	AM95_160	0.999	0.001	Amazonas
74	AM95_161	0.999	0.001	Amazonas
75	AM95_162	0.999	0.001	Amazonas
76	AM95_163	0.9985	0.0015	Amazonas
77	AM95_164	0.994	0.006	Amazonas
78	AM95_165	0.998	0.002	Amazonas
79	AM95_166	0.9985	0.0015	Amazonas
80	AM95_167	0.983	0.017	Amazonas
81	AM95_168	0.995	0.005	Amazonas
82	AM95_169	0.999	0.001	Amazonas
83	AM95_17	0.4294	0.5706	Amazonas
84	AM95_170	0.996	0.004	Amazonas
86	AM95_172	0.995	0.005	Amazonas
87	AM95_173	0.9902	0.0098	Amazonas
88	AM95_174	0.9753	0.0247	Amazonas
89	AM95_176	0.9928	0.0072	Amazonas
90	AM95_177	0.9985	0.0015	Amazonas
91	AM95_178	0.9872	0.0128	Amazonas
92	AM95_18	1000	0.0000	Amazonas
93	AM95_180	0.9985	0.0015	Amazonas
94	AM95_184	0.9827	0.0173	Amazonas
95	AM95_185	0.996	0.004	Amazonas
96	AM95_19	1000	0.0000	Amazonas
97	AM95_194	0.9965	0.0035	Amazonas
98	AM95_195	0.9985	0.0015	Amazonas
99	AM95_196	0.9725	0.0275	Amazonas
100	AM95_197	0.999	0.001	Amazonas
101	AM95_198	0.999	0.001	Amazonas
102	AM95_199	0.9985	0.0015	Amazonas
103	AM95_20	0.9342	0.0658	Amazonas
104	AM95_21	0.9315	0.0685	Amazonas
105	AM95_22	0.9355	0.0645	Amazonas
106	AM95_220	1000	0.0000	Amazonas
107	AM95_221	1000	0.0000	Amazonas
108	AM95_223	1000	0.0000	Amazonas
109	AM95_224	1000	0.0000	Amazonas
110	AM95_225	1000	0.0000	Amazonas
111	AM95_226	1000	0.0000	Amazonas
112	AM95_227	1000	0.0000	Amazonas
113	AM95_229	1000	0.0000	Amazonas
114	AM95_23	1000	0.0000	Amazonas
115	AM95_230	1000	0.0000	Amazonas
116	AM95_231	1000	0.0000	Amazonas
117	AM95_232	1000	0.0000	Amazonas
118	AM95_233	1000	0.0000	Amazonas
119	AM95_235	1000	0.0000	Amazonas
121	AM95_237	0.9995	0.0005	Amazonas
122	AM95_238	0.9995	0.0005	Amazonas
123	AM95_24	0.9999	0.0001	Amazonas
124	AM95_240	0.999	0.001	Amazonas
125	AM95_241	1000	0.0000	Amazonas
126	AM95_242	1000	0.0000	Amazonas
127	AM95_244	0.9989	0.0011	Amazonas
128	AM95_246	1000	0.0000	Amazonas
129	AM95_247	1000	0.0000	Amazonas
130	AM95_248	0.9999	0.0001	Amazonas
131	AM95_249	1000	0.0000	Amazonas
132	AM95_251	0.9999	0.0001	Amazonas
133	AM95_252	0.999	0.001	Amazonas
134	AM95_253	1000	0.0000	Amazonas
135	AM95_255	0.9975	0.0025	Amazonas
136	AM95_258	0.9995	0.0005	Amazonas
137	AM95_264	0.9987	0.0013	Amazonas
138	AM95_301	1000	0.0000	Amazonas
139	AM95_302	0.9551	0.0449	Amazonas
140	AM95_303	0.9995	0.0005	Amazonas
141	AM95_304	0.3539	0.6461	Amazonas
142	AM95_308	0.9955	0.0045	Amazonas
143	AM95_309	0.4729	0.5271	Amazonas
144	AM95_314	1000	0.0000	Amazonas
145	AM95_326	0.9985	0.0015	Amazonas
146	AM95_327	0.981	0.019	Amazonas
147	AM95_330	1000	0.0000	Amazonas
148	AM95_331	0.9999	0.0001	Amazonas
149	AM95_332	1000	0.0000	Amazonas
150	AM95_333	1000	0.0000	Amazonas
151	AM95_336	1000	0.0000	Amazonas
152	AM95_337	1000	0.0000	Amazonas
153	AM95_338	1000	0.0000	Amazonas
154	AM95_339	0.9999	0.0001	Amazonas
155	AM95_340	1000	0.0000	Amazonas
156	AM95_341	1000	0.0000	Amazonas
157	AM95_342	1000	0.0000	Amazonas
158	AM95_343	1000	0.0000	Amazonas
159	AM95_344	0.999	0.001	Amazonas
160	AM95_345	1000	0.0000	Amazonas
161	AM95_346	1000	0.0000	Amazonas
162	AM95_347	1000	0.0000	Amazonas
163	AM95_348	1000	0.0000	Amazonas
164	AM95_349	1000	0.0000	Amazonas
165	AM95_350	0.9995	0.0005	Amazonas
166	AM95_351	0.9547	0.0453	Amazonas
167	AM95_352	1000	0.0000	Amazonas
168	AM95_353	1000	0.0000	Amazonas
169	AM95_354	1000	0.0000	Amazonas
170	AM95_355	1000	0.0000	Amazonas
172	AM95_358	1000	0.0000	Amazonas
173	AM95_359	1000	0.0000	Amazonas
174	AM95_360	1000	0.0000	Amazonas
175	AM95_361	1000	0.0000	Amazonas
176	AM95_362	0.9985	0.0015	Amazonas
177	AM95_363	1000	0.0000	Amazonas
178	AM95_364	0.9997	0.0003	Amazonas
179	AM95_368	1000	0.0000	Amazonas
181	AM95_448	1000	0.0000	Amazonas
182	AM95_449	1000	0.0000	Amazonas
183	AM95_450	0.9989	0.0011	Amazonas
185	AM95_455	1000	0.0000	Amazonas
186	AM95_456	1000	0.0000	Amazonas
187	AM95_458	1000	0.0000	Amazonas
188	AM95_459	1000	0.0000	Amazonas
189	AM95_460	1000	0.0000	Amazonas
190	AM95_461	1000	0.0000	Amazonas
191	AM95_463	0.8355	0.1645	Amazonas
192	AM95_464	0.003	0.997	Amazonas
193	AM95_466	0.9986	0.0014	Amazonas
194	AM95_468	1000	0.0000	Amazonas
195	AM95_470	1000	0.0000	Amazonas
196	AM95_471	1000	0.0000	Amazonas
198	AM95_474	1000	0.0000	Amazonas
199	AM95_476	1000	0.0000	Amazonas
200	AM95_477	1000	0.0000	Amazonas
201	AM95_478	0.999	0.001	Amazonas
202	AM95_481	0.5596	0.4404	Amazonas
203	AM95_517	0.8865	0.1135	Amazonas
204	AM95_518	0.3956	0.6044	Amazonas
205	AM95_519	0.9375	0.0625	Amazonas
206	AM95_520	0.9592	0.0408	Amazonas
207	AM95_521	0.9975	0.0025	Amazonas
208	AM95_522	1000	0.0000	Amazonas
209	AM95_523	0.8155	0.1845	Amazonas
210	AM95_524	0.9365	0.0635	Amazonas
211	AM95_527	0.971	0.029	Amazonas
212	AM95_528	0.9135	0.0865	Amazonas
213	AM95_529	0.6585	0.3415	Amazonas
214	AM95_530	0.9505	0.0495	Amazonas
215	AM95_531	0.9995	0.0005	Amazonas
216	AM95_532	0.9966	0.0034	Amazonas
217	AM95_533	1000	0.0000	Amazonas
218	AM95_534	0.987	0.013	Amazonas
219	AM95_536	0.6753	0.3247	Amazonas
220	AM95_537	0.9995	0.0005	Amazonas
221	AM95_541	0.9975	0.0025	Amazonas
222	AM95_543	1000	0.0000	Amazonas
223	AM95_544	1000	0.0000	Amazonas
224	AM95_545	1000	0.0000	Amazonas
225	AM95_547	0.9185	0.0815	Amazonas
226	AM95_73	0.996	0.004	Amazonas
227	AM95_74	1000	0.0000	Amazonas
228	AM95_75	0.999	0.001	Amazonas
229	AM95_76	0.0055	0.9945	Amazonas
230	AM95_77	0.002	0.998	Amazonas
231	AM95_78	0.9517	0.0483	Amazonas
232	AM95_98	0.999	0.001	Amazonas
233	AM95_99	0.997	0.003	Amazonas
234	GT1	0.0017	0.9983	Wickham
234	GT1	0.0017	0.9983	Wickham
235	IRCA1159	0.002	0.998	Wickham
236	IRCA209	0.0172	0.9828	Wickham
237	IRCA230	0.001	0.999	Wickham
238	IRCA27	0.001	0.999	Wickham
239	IRCA707	0.001	0.9899	Wickham
240	IS_10_3	0.989	0.011	Acre
242	IS_11_3	0.9995	0.0005	Acre
243	IS_12_2	0.9995	0.0005	Acre
244	IS_12_3	0.992	0.008	Acre
245	IS_13_3	0.9995	0.0005	Acre
246	IS_14_3	1000	0.0000	Acre
247	IS_15_2	0.9995	0.0005	Acre
248	IS_16_1	0.9995	0.0005	Acre
249	IS_16_3	0.9995	0.0005	Acre
250	IS_17_3	0.9995	0.0005	Acre
251	IS_19_2	0.9993	0.0007	Acre
252	IS_19_4	0.9995	0.0005	Acre
264	IS_2_1	0.9995	0.0005	Acre
265	IS_2_4	0.9992	0.0008	Acre
253	IS_20_2	1000	0.0000	Acre
254	IS_21_2	0.999	0.001	Acre
255	IS_22_1	0.9997	0.0003	Acre
256	IS_24_1	1000	0.0000	Acre
257	IS_24_5	1000	0.0000	Acre
258	IS_25_2	0.7978	0.2022	Acre
259	IS_26_2	0.9985	0.0015	Acre
260	IS_27_1	0.9995	0.0005	Acre
261	IS_28_1	0.999	0.001	Acre
262	IS_28_2	0.9999	0.0001	Acre
263	IS_29_1	0.9971	0.0029	Acre
270	IS_3_2	1000	0.0000	Acre
271	IS_3_3	0.999	0.001	Acre
266	IS_31_2	0.999	0.001	Acre
267	IS_33_1	0.9999	0.0001	Acre
268	IS_34_5	0.9999	0.0001	Acre
269	IS_35_1	0.999	0.001	Acre
272	IS_4_2	0.9995	0.0005	Acre
273	IS_4_3	0.999	0.001	Acre
274	IS_5_1	0.9995	0.0005	Acre
275	IS_6_1	0.994	0.006	Acre
276	IS_6_4	0.9995	0.0005	Acre
277	IS_8_1	0.9996	0.0004	Acre
278	IS_8_7	0.6292	0.3708	Acre
279	IS_9_1	0.9999	0.0001	Acre
280	MTC07188	0.0359	0.9641	Mato_Grosso
281	MTC07188_2	0.1183	0.8817	Mato_Grosso
282	MTC113	0.0304	0.9696	Mato_Grosso
283	MTC117	0.1462	0.8538	Mato_Grosso
284	MTC413	0.2503	0.7497	Mato_Grosso
285	MTC45	0.1136	0.8864	Mato_Grosso
286	MTC526	0.1812	0.8188	Mato_Grosso
287	MTC75	0.0076	0.9924	Mato_Grosso
288	MTC94	0.1856	0.8144	Mato_Grosso
289	MTCS25	0.0787	0.9213	Mato_Grosso
290	MTIT13256	0.0608	0.9392	Mato_Grosso
291	MTIT1655	0.002	0.998	Mato_Grosso
292	MTIT177	0.0748	0.9252	Mato_Grosso
293	PA95_52	0.003	0.997	Para
294	PA95_53	0.0114	0.9886	Para
295	PA95_54	0.001	0.999	Para
296	PA95_55	0.9985	0.0015	Para
297	PA95_56	0.0056	0.9944	Para
298	PA95_57	0.0126	0.9874	Para
299	PA95_58	0.0135	0.9865	Para
300	PA95_59	0.9836	0.0164	Para
301	PA95_60	0.9265	0.0735	Para
302	PA95_61	0.996	0.004	Para
303	PA95_62	0.4644	0.5356	Para
304	PA95_63	0.9325	0.0675	Para
305	PA95_64	1000	0.0000	Para
306	PA95_65	0.991	0.009	Para
307	PA95_66	0.4664	0.5336	Para
308	PA95_67	0.9975	0.0025	Para
309	PA95_90	0.999	0.001	Para
310	PA95_91	0.9995	0.0005	Para
311	PA95_92	0.4833	0.5167	Para
313	PA95_95	0.0026	0.9974	Para
314	PA95_96	0.994	0.006	Para
315	PA95_97	0.984	0.016	Para
316	PB233	0.006	0.994	Wickham
317	PB235	0.002	0.998	Wickham
318	PB260	0.001	0.999	Wickham
319	PB311	0.004	0.996	Wickham
320	PB346	0.008	0.992	Wickham
321	RO04	0.001	0.999	Rondonia
322	RO0804651	0.9985	0.0015	Rondonia
323	RO38	0.21	0.7893	Rondonia
324	RO46	0.9762	0.0238	Rondonia
325	RO51	0.999	0.001	Rondonia
326	RO52	0.999	0.001	Rondonia
327	RO54	0.9935	0.0065	Rondonia
329	RO60	0.998	0.002	Rondonia
330	ROA726	0.6625	0.3375	Rondonia
331	ROA775	0.9975	0.0025	Rondonia
332	ROC0887	0.999	0.001	Rondonia
333	ROC0887_2	0.9985	0.0015	Rondonia
334	ROC0888	0.9975	0.0025	Rondonia
335	ROC0895	0.999	0.001	Rondonia
336	ROC0999	0.952	0.048	Rondonia
337	ROC920	0.9954	0.0046	Rondonia
338	ROC942	0.8962	0.1038	Rondonia
339	ROC981	0.977	0.023	Rondonia
340	ROCM10144	0.9585	0.0415	Rondonia
341	ROCM10154	0.9899	0.0101	Rondonia
342	ROI03	0.6875	0.3125	Rondonia
343	ROI118_2	0.9985	0.0015	Rondonia
344	ROI35	0.9535	0.0465	Rondonia
345	ROI54	0.958	0.042	Rondonia
346	ROI71	0.91	0.0893	Rondonia
347	ROI81	0.99	0.01	Rondonia
348	ROJ05197	0.9974	0.0026	Rondonia
349	ROJ05199	0.9888	0.0112	Rondonia
350	ROJ53	0.994	0.006	Rondonia
351	ROJ63	0.986	0.014	Rondonia
352	ROJP06236	0.9945	0.0055	Rondonia
353	ROJP1361	0.9925	0.0075	Rondonia
354	ROJP333	0.9846	0.0154	Rondonia
355	ROJP343	0.9867	0.0133	Rondonia
356	ROOP417	0.9533	0.0467	Rondonia
357	ROS0888	0.997	0.003	Rondonia
358	RRII105	0.2523	0.7477	Wickham
359	RRIM600	0.0171	0.9829	Wickham
360	RRIM606	0.0072	0.9928	Wickham
361	RRIM701	0.003	0.997	Wickham
362	RRIM710	0.001	0.999	Wickham
363	RRIM728	0.002	0.998	Wickham
364	RRIM729	0.0736	0.9264	Wickham
365	RRIM805	0.764	0.236	Wickham
366	RRIM809	0.6224	0.3776	Wickham
367	RRIM913	0.0018	0.9982	Wickham
368	RRIM915	0.001	0.999	Wickham
369	RRIM937	0.0017	0.9983	Wickham
